# Supplementary material for: Impact of Endogenous Pneumococcal Hydrogen Peroxide on the Activity and Release of Pneumolysin
Source: MDPI journal article supplement (doi:10.3390/toxins15100593), 2023-09-30
Supplement: s1 [file s1]

**Table S1. Primers used for RT PCR**

| <b>Primer</b> | <b>Sequence (5'-3')</b> |
|---------------|-------------------------|
| 16S rRNA-fw   | GGTGAGTAACGCGTAGGTAA    |
| 16S rRNA-rev  | ACGATCCGAAAACCTTCTTC    |
| murN-fw       | CAAGCGGAGTTTCTCATAGC    |
| murN-rev      | CAAGTCTCGCGCTTCTG       |
| murM-fw       | CTATGCTCGCAGTAAGAGAGTG  |
| murM-rev      | CACCTTACTCCCATTGTTGC    |
| pcpA-fw       | CTTGACCAGCTTCAAACCTCTAC |
| pcpA-rev      | CAGCTGCGGTTATTTAGCAG    |
| strH-fw       | GTCCTGCGACTACTAGTTCTG   |
| strH-rev      | GTCAATGGACATCGTAGCAAC   |
